# Supplementary material for: Conformational changes in bovine α-lactalbumin and β-lactoglobulin evoked by interaction with C18 unsaturated fatty acids provide insights into increased allergic potential
Source: Royal Society of Chemistry journal article supplement (doi:10.1039/d0fo02028a), 2020-01-01
Supplement: d0fo02028a1.pdf [file d0fo02028a1.pdf]

### Supplementary Data

**Table S1.** The quantity of fatty acid remaining in C18 UFA-treated BLA and BLG complexes after dialysis. Results represent mean  $\pm$  SD.

| UFA-treated BLA complexes | Molar ratio after dialysis (UFA: BLA) | UFA-treated BLG complexes | Molar ratio after dialysis (UFA: BLG) |
|---------------------------|---------------------------------------|---------------------------|---------------------------------------|
| OA-BLA                    | 6.9 $\pm$ 0.11                        | OA-BLG                    | 7.1 $\pm$ 0.43                        |
| LA-BLA                    | 8.9 $\pm$ 0.03                        | LA-BLG                    | 6.5 $\pm$ 0.14                        |
| CLA-BLA                   | 8.0 $\pm$ 0.66                        | CLA-BLG                   | 8.5 $\pm$ 0.26                        |
| ALA-BLA                   | 9.3 $\pm$ 0.29                        | ALA-BLG                   | 9.2 $\pm$ 0.03                        |
| GLA-BLA                   | 9.2 $\pm$ 0.12                        | GLA-BLG                   | 9.6 $\pm$ 0.13                        |

**Table S2.** Information of bovine milk allergic patients.

| Patient No. | Sex    | Age (year) | Milk-related clinical symptoms | Milk S-IgE (kU <sub>A</sub> /L) |
|-------------|--------|------------|--------------------------------|---------------------------------|
| 1           | Male   | 15         | Angioedema of the palate       | 13.67                           |
| 2           | Male   | 46         | Diarrhoea                      | 13.8                            |
| 3           | Male   | 22         | Vomiting, diarrhoea            | 25.4                            |
| 4           | Female | 30         | Diarrhoea                      | 35.8                            |
| 5           | Male   | 23         | NK                             | 23.4                            |
| 6           | Female | 44         | NK                             | 89.8                            |
| 7           | Male   | 10         | Eczema, vomiting               | >100                            |
| 8           | Male   | 24         | NK                             | 43.6                            |
| 9           | Male   | NK         | NK                             | 32                              |
| 10          | Female | 19         | NK                             | 403.95                          |

NK, not known.

**Table S3.** The increased optical density fold of C18 UFA-treated BLA and BLG in the UV absorption spectra.

| Samples | The maximum optical density (OD <sub>max</sub> ) | The increased fold (treated BLA/BLA) | Samples | The maximum optical density (OD <sub>max</sub> ) | The increased fold (treated BLG/BLG) |
|---------|--------------------------------------------------|--------------------------------------|---------|--------------------------------------------------|--------------------------------------|
| BLA     | 0.316                                            | /                                    | BLG     | 0.160                                            | /                                    |
| hBLA    | 0.358                                            | 1.13                                 | hBLG    | 0.159                                            | 0.99                                 |
| OA-BLA  | 0.386                                            | 1.22                                 | OA-BLG  | 0.172                                            | 1.08                                 |
| LA-BLA  | 0.491                                            | 1.55                                 | LA-BLG  | 0.213                                            | 1.33                                 |
| CLA-BLA | 0.463                                            | 1.47                                 | CLA-BLG | 0.368                                            | 2.30                                 |
| ALA-BLA | 0.677                                            | 2.14                                 | ALA-BLG | 0.428                                            | 2.68                                 |
| GLA-BLA | 1.040                                            | 3.29                                 | GLA-BLG | 0.794                                            | 4.96                                 |

**Table S4.** The increased fluorescence intensities fold of C18 UFA-treated BLA and BLG in the ANS fluorescence spectra.

| Samples | The maximum fluorescence intensities (FI <sub>max</sub> ) | The increased fold (treated BLA/BLA) | Samples | The maximum fluorescence intensities (FI <sub>max</sub> ) | The increased fold (treated BLG/BLG) |
|---------|-----------------------------------------------------------|--------------------------------------|---------|-----------------------------------------------------------|--------------------------------------|
| BLA     | 1089                                                      | /                                    | BLG     | 2195                                                      | /                                    |
| hBLA    | 1105                                                      | 1.01                                 | hBLG    | 2644                                                      | 1.20                                 |
| OA-BLA  | 1533                                                      | 1.41                                 | OA-BLG  | 2581                                                      | 1.18                                 |
| LA-BLA  | 2106                                                      | 1.93                                 | LA-BLG  | 2711                                                      | 1.24                                 |
| CLA-BLA | 1911                                                      | 1.75                                 | CLA-BLG | 3070                                                      | 1.40                                 |
| ALA-BLA | 2489                                                      | 2.29                                 | ALA-BLG | 3807                                                      | 1.73                                 |
| GLA-BLA | 3481                                                      | 3.20                                 | GLA-BLG | 4165                                                      | 1.90                                 |

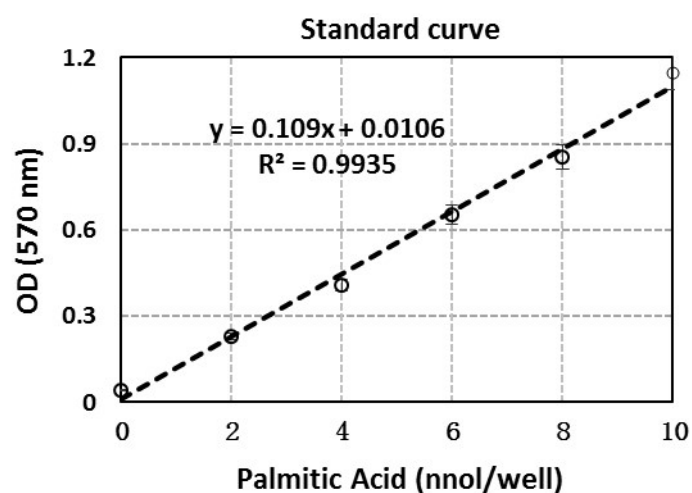

**Fig. S1.** The palmitic acid standard curve according to the Free Fatty Acid Quantification kit protocol. Briefly, the samples were added to a 96-well plate in several dilutions. In parallel, a standard curve was prepared with known amounts of palmitic acid. FA assay buffer was added to each well to reach a final volume of 50  $\mu$ L. Acyl-CoA synthetase (2  $\mu$ L) was then added to each well to convert FA to their CoA derivatives, followed by incubation at 37°C for 30 min. A solution of enzymes, enhancer and a FA probe was added to each well to generate the color. After 30 min of incubation at 37°C in the dark, the absorbance was detected at 570 nm using an ELISA plate reader (Model 1860, Bio-Rad, USA).

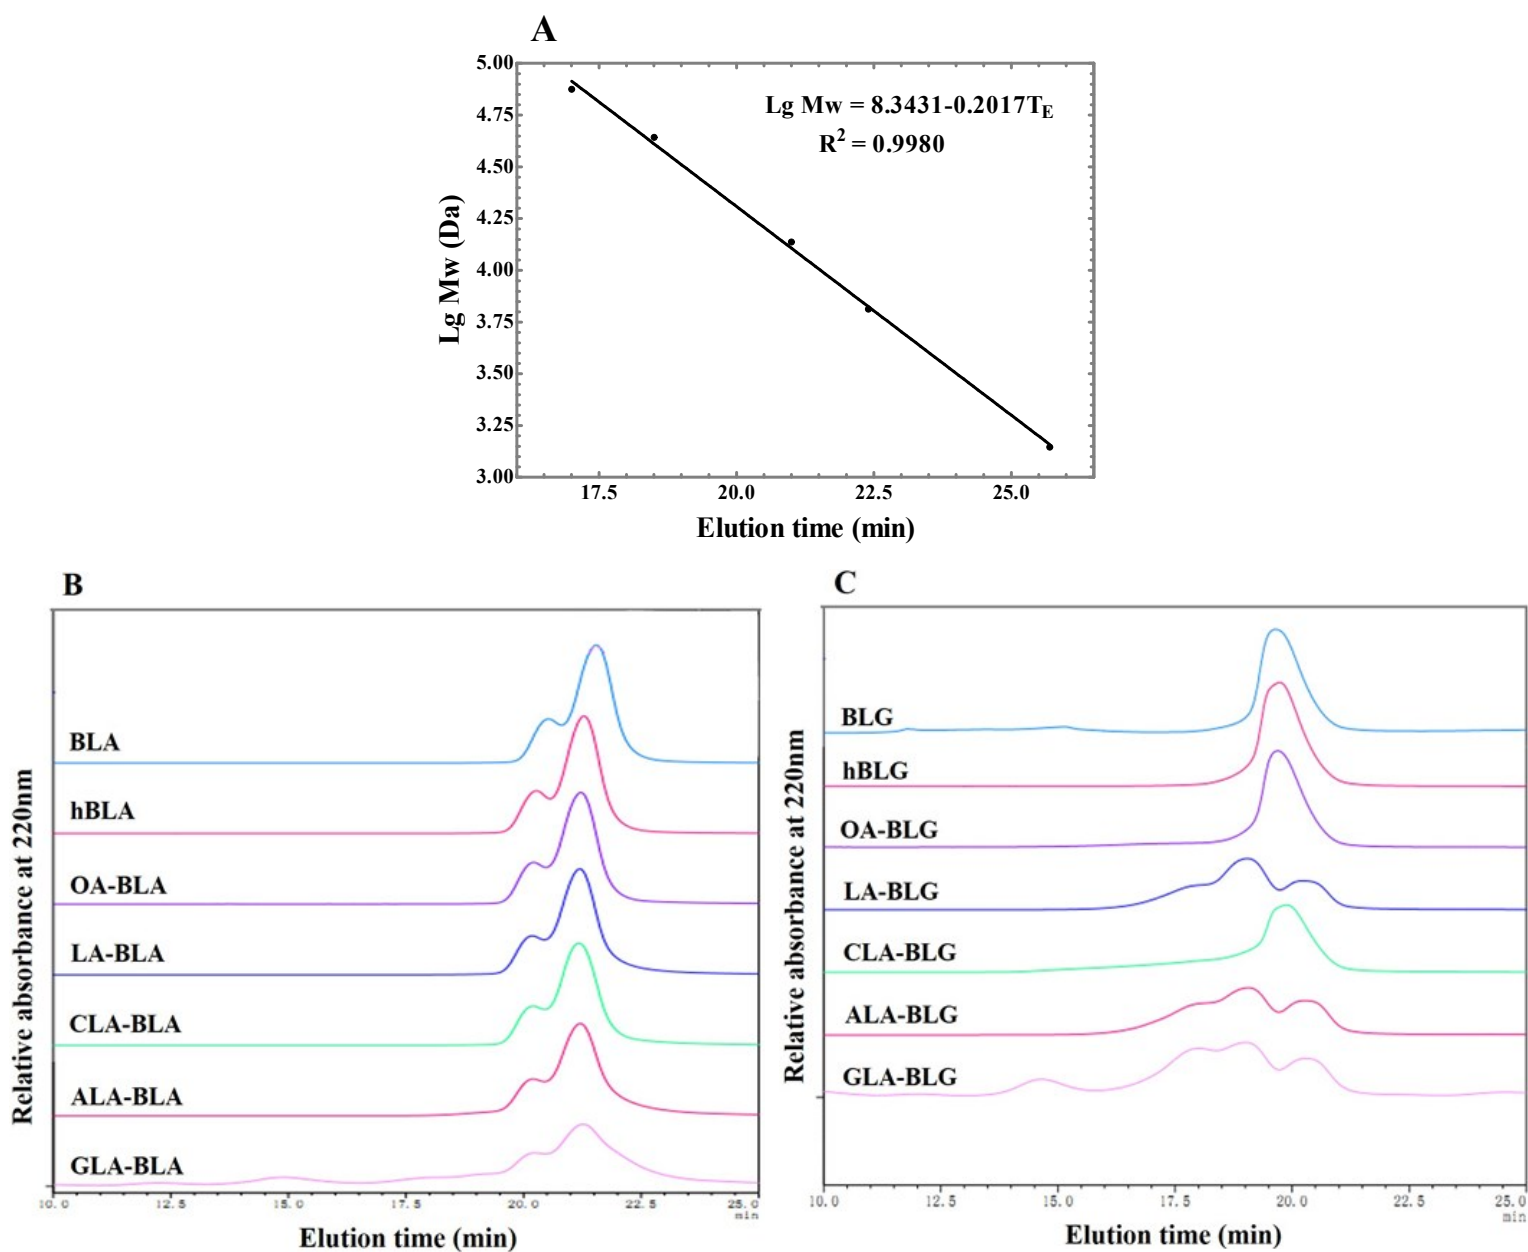

**Fig. S2.** GF-HPLC of the C18 UFA-treated BLA and BLG. (A) The calibration curve of the PROTEIN KW-802.5 column obtained using as protein standard conalbumin (75 kDa), ovalbumin (44 kDa), ribonuclease A (13.7 kDa), aprotinin (6.5 kDa), and bacitracin A (1.4 kDa). (B) GF-HPLC analyses of the samples of BLA with different kinds of UFA. (C) GF-HPLC analyses of the samples of BLG with different kinds of UFA.
